# Supplementary material
Source: PubMed Central journal article supplement (PMC5574163)
Supplement: NIHMS898149-supplement-Supplemental.pdf [file NIHMS898149-supplement-Supplemental.pdf]

Table S1. Genes significantly expressed by nicotine treatment

| Gene Symbol | Gene Name                                                                                         | Nicotine              |       |
|-------------|---------------------------------------------------------------------------------------------------|-----------------------|-------|
|             |                                                                                                   | p-value               | Ratio |
| ABCD3       | ATP-binding cassette, sub-family D (ALD), member 3                                                | 0.047                 | 1.17  |
| ACAT2       | Acetyl-Coenzyme A acyltransferase 2                                                               | 0.046                 | 1.22  |
| ACATE3      | Acyl-Coenzyme A thioesterase 3                                                                    | $9.09 \times 10^{-3}$ | 0.78  |
| ADCY8       | Adenylyl cyclase 8                                                                                | 0.034                 | 0.80  |
| ADRA1B      | Adrenergic receptor, alpha 1b                                                                     | $4.88 \times 10^{-3}$ | 1.31  |
| AGT         | Angiotensinogen                                                                                   | 0.039                 | 1.50  |
| ALG2        | Asparagine-linked glycosylation 2 homolog (yeast, alpha-1,3-mannosyltransferase)                  | $2.75 \times 10^{-3}$ | 1.38  |
| APC         | Adenomatosis polyposis coli                                                                       | 0.046                 | 0.83  |
| APG4C       | APG4 (ATG4) autophagy-related homolog C ( <i>S. cerevisiae</i> )                                  | 0.045                 | 0.83  |
| APOA1       | Apolipoprotein A-I                                                                                | 0.044                 | 1.68  |
| AR          | Androgen receptor                                                                                 | 0.016                 | 0.76  |
| ARAF1       | V-raf murine sarcoma 3611 viral oncogene homolog 1                                                | 0.030                 | 1.24  |
| ARPC1A      | Suppressor of profilin/p41 of actin-related complex 2/3                                           | 0.033                 | 1.58  |
| ARPC1B      | Actin related protein 2/3 complex, subunit 1B                                                     | 0.042                 | 1.26  |
| ASPA        | Aspartoacylase                                                                                    | 0.041                 | 0.75  |
| ATF2        | Activating transcription factor 2                                                                 | 0.016                 | 0.80  |
| ATP5L       | ATP synthase, H <sup>+</sup> transporting, mitochondrial F0 complex, subunit g; F1F0-ATP          | 0.048                 | 0.74  |
| ATP6V1A1    | ATPase, H <sup>+</sup> transporting, V1 subunit A, isoform 1; ATPase, H <sup>+</sup> transporting | 0.012                 | 1.28  |
| B3GALT3     | UDP-Gal:betaGlcNAc beta 1,3-galactosyltransferase, polypeptide 3                                  | 0.034                 | 0.70  |
| BCL2        | B cell leukemia/lymphoma 2                                                                        | 0.033                 | 1.24  |
| BCL2L11     | Bcl-12-like 11 (apoptosis facilitator)                                                            | 0.023                 | 0.65  |
| BEGAIN      | Brain-enriched guanylate kinase-associated protein 1 mRNA, complete cds                           | 0.030                 | 1.26  |
| BRCA1       | Breast cancer 1                                                                                   | 0.033                 | 0.71  |
| CACNA1G     | Calcium channel, voltage-dependent, T type, alpha 1g subunit                                      | 0.019                 | 1.38  |

|        |                                                                                         |                       |      |
|--------|-----------------------------------------------------------------------------------------|-----------------------|------|
| CALCR  | Calcitonin receptor                                                                     | 0.041                 | 1.25 |
| CALCRL | Calcitonin receptor-like receptor                                                       | 0.026                 | 1.63 |
| CALD1  | Caldesmon 1                                                                             | 0.020                 | 1.27 |
| CALM2  | Calmodulin 2                                                                            | 0.043                 | 1.39 |
| CALR   | Calreticulin                                                                            | 0.039                 | 1.25 |
| CAMK1  | CaM-like protein kinase                                                                 | $3.08 \times 10^{-3}$ | 0.84 |
| CATNA1 | Catenin alpha 1                                                                         | 0.043                 | 1.25 |
| CATNB  | Catenin beta                                                                            | 0.011                 | 1.46 |
| CCNA2  | Cyclin A2                                                                               | 0.022                 | 1.22 |
| CCND3  | Cyclin D3                                                                               | $8.99 \times 10^{-3}$ | 1.32 |
| CCNE1  | Cyclin E1                                                                               | 0.030                 | 1.64 |
| CD3G   | CD3 antigen, gamma polypeptide                                                          | 0.029                 | 1.19 |
| CDC14B | CDC14 cell division cycle 14 homolog B ( <i>S. cerevisiae</i> )                         | 0.024                 | 0.56 |
| CDC25A | Cell division cycle 25 homolog A ( <i>S. cerevisiae</i> )                               | $6.02 \times 10^{-3}$ | 0.75 |
| CDC2A  | Cell division cycle 2 homolog A ( <i>S. pombe</i> )                                     | 0.031                 | 0.79 |
| CDC42  | Cell division cycle 42 homolog                                                          | $9.85 \times 10^{-3}$ | 0.67 |
| CDIPT  | Phosphatidylinositol synthase                                                           | 0.030                 | 1.50 |
| CDKL2  | Cyclin-dependent kinase-like 2 (CDC2-related kinase)                                    | 0.046                 | 1.33 |
| CDRT1  | CMT1A duplicated region transcript 1                                                    | 0.012                 | 1.40 |
| CFLAR  | CASP8 and FADD-like apoptosis regulator                                                 | 0.010                 | 1.35 |
| CIAO1  | WD40 protein Ciao1                                                                      | 0.015                 | 0.64 |
| CLCN5  | Chloride channel 5                                                                      | 0.011                 | 0.64 |
| CLNS1A | Chloride channel, nucleotide-sensitive, 1A                                              | 0.023                 | 1.31 |
| CLSTN3 | Calsyntenin 3                                                                           | 0.033                 | 1.33 |
| COPS3  | COP9 (constitutive photomorphogenic) homolog, subunit 3 ( <i>Arabidopsis thaliana</i> ) | 0.046                 | 1.45 |
| COX6B  | Cytochrome c oxidase, subunit VIb                                                       | $6.98 \times 10^{-3}$ | 1.56 |
| COX7B  | Cytochrome c oxidase, subunit VIIb                                                      | 0.032                 | 1.22 |
| COX7C  | Cytochrome c oxidase, subunit VIIc                                                      | $1.71 \times 10^{-3}$ | 1.31 |
| COX8B  | Cytochrome c oxidase, subunit VIIIb                                                     | $3.37 \times 10^{-3}$ | 1.93 |
| CREG   | Cellular repressor of E1A-stimulated genes 1                                            | 0.023                 | 1.25 |
| CRSP2  | Cofactor required for Sp1 transcriptional activation subunit 2 (150 kDa)                | $4.19 \times 10^{-3}$ | 0.67 |

|          |                                                                                            |                       |      |
|----------|--------------------------------------------------------------------------------------------|-----------------------|------|
| CRYZ     | Crystallin, zeta                                                                           | 0.035                 | 1.14 |
| CSK      | C-src tyrosine kinase                                                                      | 0.044                 | 1.45 |
| CTCF     | CCCTC-binding factor                                                                       | 0.029                 | 1.18 |
| CTNF     | Ciliary neurotrophic factor receptor                                                       | $4.85 \times 10^{-3}$ | 0.74 |
| CYP17A1  | Cytochrome P450, family 17, subfamily a, polypeptide 1                                     | 0.043                 | 1.33 |
| CYP2F1   | Cytochrome P450, subfamily IIF, polypeptide 1                                              | 0.022                 | 0.68 |
| CYP2R1   | Cytochrome P450, family 2, subfamily r, polypeptide 1                                      | 0.030                 | 0.84 |
| DAB1     | Disabeled homolog 1 (Drosophila)                                                           | 0.036                 | 0.55 |
| DAXX     | Death domain-associated protein 6                                                          | $9.34 \times 10^{-3}$ | 1.25 |
| DFFA     | DNA fragmentation factor, 40 kD, beta polypeptide (caspase-activated DNase)                | $9.62 \times 10^{-3}$ | 0.88 |
| DIO2     | Deiodinase, iodothyronine, type II                                                         | 0.040                 | 1.27 |
| DNAJA4   | DnaJ (Hsp40) homolog, subfamily A, member 4                                                | $4.48 \times 10^{-3}$ | 0.66 |
| DNCIC2   | Dynein, cytoplasmic, intermediate polypeptide 2                                            | 0.024                 | 1.38 |
| DOCK7    | Dedicator of cytokinesis 7                                                                 | $3.57 \times 10^{-3}$ | 1.39 |
| DRAP1    | Dr1 associated protein 1 (negative cofactor 2 alpha)                                       | $6.61 \times 10^{-3}$ | 0.75 |
| DRD4     | Dopamine receptor D4                                                                       | 0.013                 | 1.23 |
| DRPLA    | Dentatorubral-pallidoluyisian atrophy                                                      | $5.89 \times 10^{-6}$ | 0.70 |
| DSTN     | Destrin                                                                                    | 0.012                 | 1.26 |
| DUSP1    | Dual specificity phosphatase 1 (or protein-tyrosine phosphatase, nonreceptor-type, 10)     | 0.016                 | 1.17 |
| EDG4     | Similar to endothelial differentiation, lysophosphatidic acid G-protein-coupled receptor 4 | $2.53 \times 10^{-3}$ | 1.34 |
| EIF2B    | Eukaryotic translation initiation factor 2B                                                | $8.54 \times 10^{-5}$ | 1.31 |
| EIF2B5   | Eukaryotic translation initiation factor 2B, subunit 5 epsilon                             | $7.80 \times 10^{-3}$ | 1.20 |
| EIF4EBP1 | Eukaryotic translation initiation factor 4E binding protein 1                              | 0.014                 | 0.65 |
| EPHA1    | Eph receptor a1                                                                            | 0.033                 | 0.56 |
| FASN     | Fatty acid synthase                                                                        | 0.017                 | 1.21 |
| FGF13    | Fibroblast growth factor 13                                                                | 0.034                 | 1.37 |
| FGG      | Fibrinogen, gamma polypeptide                                                              | 0.014                 | 1.22 |
| FKRP     | Fukutin related protein                                                                    | 0.040                 | 0.70 |
| FOS      | Fos oncogene                                                                               | 0.031                 | 1.28 |
| FOXO1    | Forkhead box 1                                                                             | $8.70 \times 10^{-4}$ | 0.52 |

|         |                                                                                                       |                       |      |
|---------|-------------------------------------------------------------------------------------------------------|-----------------------|------|
| FXC1    | Similar to Mitochondrial import inner membrane translocase subunit TIM9 B (Fracture callus protein 1) | 0.043                 | 1.23 |
| GABARAP | Gamma-aminobutyric acid receptor associated protein                                                   | 0.012                 | 0.79 |
| GABRA3  | Gamma-aminobutyric acid (GABA_A) receptor, subunit alpha 3                                            | $6.52 \times 10^{-4}$ | 0.77 |
| GABRD   | GABA(A) receptor delta subunit                                                                        | 0.026                 | 0.63 |
| GAL     | Galanin                                                                                               | 0.021                 | 1.39 |
| GALNT10 | UDP-N-acetyl-alpha-D-galactosamine:polypeptide N-acetylgalactosaminyltransferase 10                   | $1.37 \times 10^{-3}$ | 1.33 |
| GEMIN5  | Gem (nuclear organelle) associated protein 5                                                          | 0.015                 | 0.66 |
| GLCC1   | Glucocorticoid induced transcript 1                                                                   | 0.014                 | 0.71 |
| GLI1    | GLI-Kruppel family member GLI1                                                                        | 0.010                 | 1.33 |
| GLI3    | GLI-Kruppel family member Gli 3                                                                       | 0.037                 | 0.87 |
| GLUD1   | Glutamate dehydrogenase                                                                               | 0.047                 | 1.28 |
| GNA15   | Guanine nucleotide binding protein, alpha 15                                                          | 0.012                 | 1.41 |
| GPAA1   | GPI anchor attachment protein 1                                                                       | 0.018                 | 0.83 |
| GRIK1   | Glutamate receptor, ionotropic, kainate 1                                                             | 0.034                 | 0.67 |
| GRM2    | Glutamate receptor, metabotropic 2                                                                    | $5.59 \times 10^{-3}$ | 0.68 |
| GSPT1   | G1 to phase transition 1                                                                              | 0.035                 | 0.89 |
| GSTM6   | Glutathione S-transferase, mu6                                                                        | $7.76 \times 10^{-3}$ | 1.41 |
| GTF2H2  | General transcription factor IIH, polypeptide 2 (44 kDa subunit)                                      | 0.011                 | 0.54 |
| GTF3C5  | General transcription factor IIIC, polypeptide 5                                                      | 0.036                 | 1.36 |
| GUK1    | Guanylate kinase 1                                                                                    | 0.019                 | 0.57 |
| H1F0    | H1 histone family, member 0                                                                           | 0.016                 | 1.22 |
| HBA     | Hemoglobin X, alpha-like embryonic chain in Hba complex                                               | 0.029                 | 0.72 |
| HBB     | Hemoglobin beta chain complex                                                                         | $7.12 \times 10^{-4}$ | 0.73 |
| HBG1    | Hemoglobin, gamma A                                                                                   | $4.84 \times 10^{-3}$ | 1.45 |
| HHL     | RAB GTPase activating protein 1-like                                                                  | 0.042                 | 1.27 |
| HIATL2  | Hippocampus abundant gene transcript-like 2                                                           | 0.033                 | 0.69 |
| HIS4    | Histone 4 protein                                                                                     | 0.045                 | 1.19 |
| HMG1    | High mobility group nucleosomal binding domain 1                                                      | 0.014                 | 1.42 |
| HRMT1L2 | Heterogeneous nuclear ribonucleoproteins methyltransferase-                                           | 0.019                 | 0.79 |

|        |                                                                                    |                       |      |
|--------|------------------------------------------------------------------------------------|-----------------------|------|
|        | like 2 ( <i>S. cerevisiae</i> )                                                    |                       |      |
| HTR3A  | 5-hydroxytryptamine receptor 3a (Htr3a)                                            | $1.77 \times 10^{-3}$ | 1.65 |
| IDG3G  | Isocitrate dehydrogenase 3 (NAD <sup>+</sup> ), gamma                              | 0.038                 | 1.41 |
| IGF1R  | Insulin like growth factor receptor 1                                              | 0.035                 | 0.70 |
| IGSF4A | Cell adhesion molecule 1                                                           | $6.48 \times 10^{-4}$ | 1.21 |
| IKBKG  | Inhibitor of kappa light polypeptide gene enhancer in B-cells, kinase gamma        | 0.031                 | 1.27 |
| IL6R   | Interleukin 6 receptor                                                             | $5.48 \times 10^{-3}$ | 1.17 |
| IL6RA  | Interleukin 6 receptor, alpha                                                      | 0.044                 | 0.62 |
| IL6ST  | Interleukin 6 signal transducer                                                    | $9.39 \times 10^{-3}$ | 0.74 |
| IL7R   | Interleukin 7 receptor                                                             | 0.047                 | 1.37 |
| IMPA1  | Lithium-sensitive myo-inositol monophosphatase A1                                  | 0.015                 | 1.25 |
| ING4   | Inhibitor of growth family, member 4                                               | 0.024                 | 1.25 |
| IRAK3  | Interleukin-1 receptor-associated kinase 3                                         | 0.041                 | 0.67 |
| ITGB1  | Integrin beta 1                                                                    | 0.043                 | 0.86 |
| ITPKA  | Inositol 1,4,5-trisphosphate 3-kinase A                                            | $7.66 \times 10^{-3}$ | 1.14 |
| ITPR5  | Inositol 1,4,5-triphosphate receptor 5                                             | $2.67 \times 10^{-3}$ | 0.81 |
| JAK3   | Janus kinase 3                                                                     | 0.024                 | 0.80 |
| KCMF1  | Potassium channel modulatory factor 1                                              | 0.034                 | 0.76 |
| KCNB2  | Potassium voltage gated channel, Shab-related subfamily, member 2                  | 0.039                 | 0.80 |
| KCNC2  | Potassium voltage gated channel, Shaw-related subfamily, member 3                  | 0.017                 | 0.86 |
| KCNK1  | Putative potassium channel TWIK                                                    | 0.012                 | 1.20 |
| KCNMA1 | Potassium large conductance calcium-activated channel, subfamily M, alpha member 1 | $1.93 \times 10^{-3}$ | 1.45 |
| KITL   | Kit ligand                                                                         | $1.05 \times 10^{-3}$ | 0.77 |
| KPNB1  | Karyopherin (importin) beta 1                                                      | $5.08 \times 10^{-3}$ | 1.20 |
| LAG3   | Lymphocyte-activation gene 3                                                       | 0.012                 | 0.78 |
| LAMB2  | Laminin beta                                                                       | 0.043                 | 1.54 |
| LAMC1  | Lamnin gamma                                                                       | $5.02 \times 10^{-3}$ | 0.76 |
| LAMR1  | Laminin receptor 1                                                                 | 0.044                 | 1.21 |
| LIMK1  | Lim kinase LIM motif-containing protein kinase 1                                   | 0.040                 | 0.71 |

|           |                                                                                         |                       |      |
|-----------|-----------------------------------------------------------------------------------------|-----------------------|------|
| LMO1      | LIM domain only 3                                                                       | 0.023                 | 0.82 |
| LPL       | Lipoprotein lipase                                                                      | 0.020                 | 0.74 |
| LRP1      | Low density lipoprotein receptor-related protein 1                                      | $8.86 \times 10^{-3}$ | 0.74 |
| LRP4      | Low density lipoprotein receptor-related protein 4                                      | $2.93 \times 10^{-3}$ | 1.41 |
| LTBP3     | Latent transforming growth factor beta binding protein 3                                | 0.030                 | 1.27 |
| MAF       | Avian musculoaponeurotic fibrosarcoma (v-maf) AS42 oncogene homolog                     | 0.012                 | 1.34 |
| MAP2K5    | Mitogen activated protein kinase kinase 5                                               | $2.96 \times 10^{-3}$ | 0.86 |
| MAP3K7IP1 | Mitogen-activated protein kinase kinase kinase 7 interacting protein 1                  | $7.63 \times 10^{-3}$ | 1.45 |
| MAP4K4    | Mitogen-activated protein kinase kinase kinase kinase 4                                 | $3.33 \times 10^{-4}$ | 0.69 |
| MAPK14    | Mitogen activated protein kinase 14                                                     | $8.65 \times 10^{-3}$ | 1.35 |
| MAS1      | MAS1 oncogene                                                                           | 0.014                 | 0.79 |
| MATR3     | Matrin 3                                                                                | 0.011                 | 0.73 |
| MCM5      | Minichromosome maintenance deficient 5, cell division cycle 46 ( <i>S. cerevisiae</i> ) | 0.041                 | 1.10 |
| MEF2D     | Myocyte enhancer factor 2d                                                              | $7.73 \times 10^{-3}$ | 1.35 |
| MKLN1     | Muskelin 1, intracellular mediator containing kelch motifs                              | $4.12 \times 10^{-5}$ | 0.68 |
| MLYCD     | Malonyl-CoA decarboxylase                                                               | $8.54 \times 10^{-3}$ | 1.66 |
| MME       | Membrane metallo endopeptidase                                                          | 0.024                 | 1.21 |
| MRE11A    | Meiotic recombination 11 homolog A ( <i>S. cerevisiae</i> )                             | 0.036                 | 0.70 |
| MRPL39    | Mitochondrial ribosomal protein L39                                                     | $1.22 \times 10^{-3}$ | 0.78 |
| MRPS14    | Mitochondrial ribosomal protein S14                                                     | $5.45 \times 10^{-3}$ | 0.71 |
| MRPS17    | Mitochondrial ribosomal protein S17                                                     | 0.019                 | 0.82 |
| MRPS7     | Mitochondrial ribosomal protein S7                                                      | $7.10 \times 10^{-3}$ | 1.62 |
| MTC       | MT-protocadherin (KIAA 1775)                                                            | $3.55 \times 10^{-4}$ | 1.29 |
| MTEFR     | Transcription termination factor, mitochondrial-like                                    | 0.025                 | 0.66 |
| MYO7A     | Myosin VIIA                                                                             | $7.50 \times 10^{-3}$ | 0.64 |
| NCBP1     | Nuclear cap binding protein subunit 1, 80kDa                                            | $2.15 \times 10^{-3}$ | 1.36 |
| NDUFA4    | NADH dehydrogenase (ubiquinone) 1 alpha subcomplex, 4                                   | $3.41 \times 10^{-3}$ | 1.40 |
| NDUFV1    | NADH dehydrogenase (ubiquinone) flavoprotein 1                                          | 0.022                 | 1.65 |
| NEU3      | Neurotrophic tyrosine kinase, receptor, type 1                                          | 0.034                 | 1.25 |
| NEUD4     | Neuronal d4 domain family member                                                        | 0.018                 | 1.70 |

|         |                                                                           |                       |      |
|---------|---------------------------------------------------------------------------|-----------------------|------|
| NFATC3  | Nuclear factor of activated T-cells, cytoplasmic, calcineurin-dependent 3 | 0.010                 | 0.74 |
| NFE2L2  | Nuclear factor, erythroid derived 2, like 2                               | $1.38 \times 10^{-4}$ | 1.12 |
| NGFA    | Nerve growth factor, alpha                                                | 0.029                 | 1.20 |
| NGFR    | Nerve growth factor receptor                                              | $4.51 \times 10^{-3}$ | 1.46 |
| NINJ1   | Ninjurin 1                                                                | 0.031                 | 0.72 |
| NLK1    | Nemo like kinase                                                          | $3.33 \times 10^{-3}$ | 0.55 |
| NOL5    | Nucleolar protein 5                                                       | $3.10 \times 10^{-3}$ | 0.80 |
| NR2F1   | Nuclear receptor subfamily 2, group F, member 1                           | $1.74 \times 10^{-3}$ | 1.33 |
| NRF1    | Nuclear respiratory factor 1                                              | 0.040                 | 0.83 |
| NRXN1   | Neurexin1                                                                 | $7.69 \times 10^{-3}$ | 0.78 |
| NSG1    | Neuron specific gene family member 1                                      | 0.039                 | 0.84 |
| NUCB    | Calcium-binding protein                                                   | 0.023                 | 1.35 |
| NXPH4   | Neurexophilin4                                                            | $3.87 \times 10^{-3}$ | 1.37 |
| OGDH    | Oxoglutarate dehydrogenase                                                | 0.031                 | 1.27 |
| OGN     | Osteoglycin                                                               | $1.48 \times 10^{-3}$ | 0.57 |
| PBX4    | Pre-B-cell leukemia transcription factor 4                                | $7.99 \times 10^{-4}$ | 1.59 |
| PCP4    | Purkinje cell protein 4                                                   | 0.011                 | 0.75 |
| PDLIM2  | PDZ and LIM domain 2                                                      | $4.91 \times 10^{-3}$ | 1.99 |
| PHYHIP  | Phytanoyl-CoA hydroxylase interacting protein                             | $5.61 \times 10^{-3}$ | 0.88 |
| PIGQ    | Glycosylphosphatidylinositol 1 homolog                                    | 0.013                 | 1.36 |
| PIK3CG  | Phosphoinositide-3-kinase, catalytic, gamma polypeptide                   | 0.049                 | 1.30 |
| PIR51   | RAD51 associated protein 1                                                | 0.050                 | 1.28 |
| PLA2G4A | Phospholipase A2, group IVA (cytosolic, calcium-dependent)                | $3.26 \times 10^{-3}$ | 1.42 |
| PMP22   | Peripheral myelin protein 22                                              | $5.96 \times 10^{-3}$ | 1.17 |
| POLE3   | Polymerase (DNA directed), epsilon 3 (p17 subunit)                        | $9.98 \times 10^{-3}$ | 1.39 |
| PPIA    | Peptidylprolyl isomerase A                                                | 0.040                 | 1.38 |
| PPM1L   | Protein phosphatase 1 (formerly 2C)-like                                  | 0.032                 | 1.35 |
| PPP1CA  | Protein phosphatase 1, catalytic subunit, alpha isoform                   | 0.020                 | 1.21 |
| PPT     | Palmitoyl-protein thioesterase                                            | 0.050                 | 1.56 |
| PRDX6   | Peroxiredoxin 6                                                           | 0.023                 | 1.22 |
| PRRX1   | Paired related homeobox 1                                                 | 0.050                 | 1.16 |

|         |                                                                    |                       |      |
|---------|--------------------------------------------------------------------|-----------------------|------|
| PSCDBP  | Pleckstrin homology, Sec7 and coiled-coil domains, binding protein | $9.26 \times 10^{-3}$ | 0.89 |
| PSMB4   | Proteasome (prosome, macropain) subunit, beta type, 4              | $2.14 \times 10^{-3}$ | 1.23 |
| PSMD10  | Proteasome (prosome, macropain) 26S subunit, non-ATPase, 10        | 0.025                 | 1.17 |
| PSMD14  | Proteasome (prosome, macropain) 26S subunit, non-ATPase, 14        | 0.029                 | 0.70 |
| PSMD2   | 26S proteasome, non-ATPase, 2                                      | $2.37 \times 10^{-3}$ | 1.54 |
| PTH     | Parathyroid hormone                                                | 0.040                 | 1.19 |
| PTP4A2  | Protein tyrosine phosphatase type 4a, member 2                     | 0.027                 | 1.24 |
| PTPRZ1  | Protein tyrosine phosphatase, receptor type, Z1                    | 0.041                 | 0.90 |
| RAB1    | Ras-related protein                                                | 0.036                 | 1.23 |
| RAB7    | Ras 7 member of RAS oncogene family                                | 0.042                 | 0.80 |
| RAB9    | Ras 9 member of RAS oncogene family                                | 0.036                 | 1.32 |
| RAD1    | RAD1 homolog (S. pombe)                                            | $6.01 \times 10^{-4}$ | 0.69 |
| RAD51   | RAD51 homolog (S. cerevisiae)                                      | 0.013                 | 1.45 |
| RALA    | V-ral simian leukemia viral oncogene homolog A (ras related)       | $8.17 \times 10^{-3}$ | 1.74 |
| RAPGEF3 | Rap guanine nucleotide exchange factor (GEF) 3                     | 0.032                 | 0.84 |
| RASA2   | RAS p21 protein activator 2                                        | 0.034                 | 0.73 |
| RBL1    | Retinoblastoma-like 1 (p107)                                       | 0.046                 | 0.73 |
| RIS2    | Retroviral integration site 2                                      | 0.024                 | 0.74 |
| RISP    | Ubiquinol-cytochrome c reductase, Rieske iron-sulfur polypeptide 1 | 0.048                 | 0.76 |
| RNF20   | Ring finger protein 20                                             | 0.017                 | 0.69 |
| RPL18   | Ribosomal protein L18                                              | 0.031                 | 0.75 |
| RPL29   | Ribosomal protein L29                                              | $1.43 \times 10^{-3}$ | 1.50 |
| RPL36   | Ribosomal protein L36                                              | 0.031                 | 0.85 |
| RPS26   | Ribosomal protein S26                                              | 0.032                 | 1.57 |
| RPS27L  | Ribosomal protein S27                                              | 0.032                 | 1.44 |
| RPS6KA2 | Ribosomal protein S6 kinase, 90kD, polypeptide 2                   | $5.70 \times 10^{-4}$ | 0.82 |
| RPS6KB1 | Ribosomal protein S6 kinase, 70kD, polypeptide 1                   | 0.037                 | 1.28 |
| SCN11A  | Sodium channel, voltage-gated, type 11, alpha polypeptide          | 0.024                 | 1.45 |
| SCO1    | Similar to SCO cytochrome oxidase deficient homolog 1              | 0.033                 | 0.84 |



|          |                                                                            |                       |      |
|----------|----------------------------------------------------------------------------|-----------------------|------|
|          | (yeast)                                                                    |                       |      |
| SCUBE2   | Signal peptide, CUB domain, EGF-like 2                                     | $2.96 \times 10^{-3}$ | 0.67 |
| SCYA20   | Small inducible cytokine subfamily A20                                     | $4.02 \times 10^{-3}$ | 0.75 |
| SDHB     | Succinate dehydrogenase complex, subunit A, flavoprotein                   | $6.23 \times 10^{-3}$ | 1.32 |
| SDHC     | Succinate dehydrogenase complex, subunit C                                 | 0.017                 | 1.18 |
| SECISBP2 | Selenocysteine insertion sequence-binding protein 2                        | $8.27 \times 10^{-3}$ | 0.76 |
| SERPINC1 | Serine (or cysteine) peptidase inhibitor, clade C (antithrombin), member 1 | 0.040                 | 1.35 |
| SFN      | Stratifin                                                                  | 0.022                 | 1.14 |
| SKIL     | Ski like                                                                   | $8.52 \times 10^{-3}$ | 1.31 |
| SLC18A2  | Solute carrier family 18 member 2                                          | 0.023                 | 1.46 |
| SLC29A1  | Solute carrier family 29 (nucleoside transporters), member 1               | 0.021                 | 0.73 |
| SLC2A14  | Solute carrier family 2 (facilitated glucose transporter), member 14       | $4.37 \times 10^{-3}$ | 0.68 |
| SLC2A4   | Solute carrier family 2 (facilitated glucose transporter), member 4        | 0.030                 | 1.58 |
| SLC35D2  | Solute carrier family 35, member D2                                        | 0.024                 | 1.39 |
| SLC35F5  | Solute carrier family 35, member F5                                        | 0.018                 | 0.73 |
| SLC5A3   | Solute carrier family 5 (inositol transporters), member 3                  | $4.51 \times 10^{-4}$ | 0.63 |
| SLC6A4   | Solute carrier family 6, member 4 (serotonin transporter)                  | $3.78 \times 10^{-6}$ | 0.62 |
| SLC8A2   | Solute carrier family 8 (sodium/calcium exchanger), member 2               | 0.032                 | 1.30 |
| SMAD2    | MAD homolog 2 (Drosophila)                                                 | 0.035                 | 0.83 |
| SNCA     | Synuclein, alpha                                                           | $5.13 \times 10^{-3}$ | 0.71 |
| SOX6     | SoxLZ/Sox6 leucine zipper binding protein in testis                        | 0.027                 | 1.17 |
| SPEN     | SMART/HDAC1 associated repressor protein                                   | 0.024                 | 0.79 |
| STAT5A   | Signal transducer and activator of transcription 5a                        | 0.021                 | 1.25 |
| SWAP70   | Switch-associated protein 70                                               | 0.032                 | 0.61 |
| SYN2     | Synapsin 2                                                                 | 0.014                 | 1.25 |
| SYT2     | Synaptotagmin 2                                                            | $1.36 \times 10^{-3}$ | 1.24 |
| SYT7     | Synaptotagmin 7                                                            | $5.30 \times 10^{-3}$ | 1.69 |
| TAC2     | Tachykinin 2                                                               | $3.45 \times 10^{-3}$ | 0.72 |
| TBC1D17  | TBC1 domain family, member 17                                              | 0.046                 | 1.43 |

|           |                                                                    |                       |      |
|-----------|--------------------------------------------------------------------|-----------------------|------|
| TBP1      | Tat-binding protein-1                                              | 0.041                 | 0.77 |
| TCFEB     | Transcription factor EB                                            | $6.61 \times 10^{-5}$ | 0.76 |
| TDG       | Thymine DNA glycosylase                                            | 0.032                 | 0.57 |
| TF        | Transferrin                                                        | 0.028                 | 0.73 |
| TFR       | Transferrin receptor                                               | $5.66 \times 10^{-3}$ | 1.32 |
| TGFB2     | Transforming growth factor, beta 2                                 | $5.58 \times 10^{-5}$ | 0.74 |
| TGFBR2    | Transforming growth factor, beta receptor 2                        | $6.22 \times 10^{-3}$ | 0.57 |
| TNFRSF10B | Tumor necrosis factor receptor superfamily, member 10b             | 0.042                 | 1.43 |
| TRAF6     | Tnf receptor-associated factor 6                                   | 0.035                 | 0.75 |
| TRG       | Thyroid regulating gene                                            | 0.019                 | 0.69 |
| TRNT1     | TRNA nucleotidyl transferase, CCA-adding1                          | 0.022                 | 0.76 |
| TRP53     | Transformation related protein 53                                  | $6.94 \times 10^{-3}$ | 1.32 |
| TSGA13    | Testis specific gene A13                                           | $2.29 \times 10^{-3}$ | 1.07 |
| TUBB5     | Beta-tubulin, 5                                                    | 0.017                 | 1.19 |
| UAP1      | Similar to UDP-N-acteylglucosamine pyrophosphorylase 1 homolog     | 0.021                 | 1.24 |
| UBE1X     | Ubiquitin-activating enzyme e1, chr X                              | 0.019                 | 1.14 |
| UBE2A     | Ubiquitin-conjugating enzyme E2A                                   | 0.018                 | 1.54 |
| UBE2G1    | Ubiquitin-conjugating enzyme E2G 1 (UBC7 homolog, C. elegans)      | 0.023                 | 0.88 |
| UBQLN1    | Ubiquilin 1                                                        | 0.030                 | 1.18 |
| UBQLN3    | Ubiquilin 3                                                        | 0.016                 | 0.58 |
| UQCRFS1   | Ubiquinol-cytochrome c reductase, Rieske iron-sulfur polypeptide 1 | $3.11 \times 10^{-3}$ | 1.53 |
| USP28     | Ubiquitin specific protease 28                                     | $8.60 \times 10^{-3}$ | 1.29 |
| VAMP3     | Vesicle-associated membrane protein 3                              | 0.036                 | 1.21 |
| VCL       | Vinculin                                                           | $2.10 \times 10^{-3}$ | 1.39 |
| VEGFA     | Vascular endothelial growth factor A                               | 0.038                 | 0.84 |
| VGLL2     | Vestigial like 2 homolog (Drosophila)                              | 0.014                 | 1.21 |
| VIL1      | Villin1                                                            | 0.016                 | 0.65 |
| WNT1      | Wingless-related MMTV integration site 1                           | 0.042                 | 1.17 |
| XCL2      | Chemokine (C motif) ligand 2                                       | 0.023                 | 1.38 |
| XTP2      | HBxAg transactivated protein 2                                     | 0.031                 | 0.88 |

|        |                                                                                         |                       |      |
|--------|-----------------------------------------------------------------------------------------|-----------------------|------|
| YWHAH  | Tyrosine 3-monooxygenase/tryptophan 5-monooxygenase activation protein, eta polypeptide | 0.037                 | 1.21 |
| ZAP70  | Zeta-chain (TCR) associated protein kinase                                              | $2.07 \times 10^{-4}$ | 1.36 |
| ZFP98  | Zinc finger protein 98                                                                  | $8.22 \times 10^{-4}$ | 1.21 |
| ZNF189 | Zinc finger protein 189                                                                 | 0.035                 | 0.79 |
| ZNF286 | Zinc finger protein 286                                                                 | 0.012                 | 1.18 |
